# Supplementary material for: Comparison of LCST-transitions of homopolymer mixture, diblock and statistical copolymers of NIPAM and VCL in water
Source: Royal Society of Chemistry journal article supplement (doi:10.1039/c5sm00026b), 2015-01-01
Supplement: c5sm00026b1.pdf [file c5sm00026b1.pdf]

*Supporting Information for*

# Comparison of LCST-transitions of homopolymer mixture, diblock and statistical copolymers of NIPAM and VCL in water

*Lei Hou and Peiyi Wu\**

State Key Laboratory of Molecular Engineering of Polymers, Department of Macromolecular Science, and Laboratory of Advanced Materials, Fudan University, Shanghai, 200433, China

---

\*corresponding author, email: [peiyiwu@fudan.edu.cn](mailto:peiyiwu@fudan.edu.cn)

## Polymer Synthesis

Synthesis of PNIPAM macro-CTA: NIPAM (3.39 g, 30 mmol), CTA (0.0678 g, 0.3 mmol), AIBN (0.0096 g, 0.06 mmol) and 10 g methanol were added to a dry ampule. The mixture was degassed by three cycles of freeze–evacuate–thaw and then placed in a thermostated oil bath previously maintained at 60 °C. After 24 h, the reaction was stopped by sudden cooling in liquid nitrogen and exposure to air. The polymer was isolated by precipitation into a large excess of diethyl ether and collected by vacuum filtration, then vacuum-dried for 24 h.

Synthesis of PNIPAM-*b*-PVCL was described as follows: PNIPAM macro-CTA (0.56 g, 0.066 mmol), VCL (0.7 g, 10 mmol), AIBN (0.0016 g, 0.01 mmol) were dissolved in 3.8 g methanol. The solution was degassed by three freeze–evacuate–thaw cycles before immersion into a preheated oil bath maintained at 60 °C. The polymerization was conducted for 24 h and then quenched by rapid cooling in liquid nitrogen and exposure to air. After three times' precipitation by diethyl ether, the product was finally vacuum-dried for 24 h.

Synthesis of PVCL (bulk homopolymerization): typically, a mixture of VCL (1.39 g, 10 mmol), CTA 0.0236 g, 0.1 mmol) and AIBN (0.0032 g, 0.02 mmol) was added to a dry tube and degassed by three cycles of freeze-vacuum-thaw. Then, the tube was immersed in thermostatic oil bath at 60 °C. After 24 h, the solution was cooled in liquid N<sub>2</sub> and diluted with THF, followed by dropping into a large amount of diethyl ether and collected by vacuum filtration; purification was carried out by repeating dissolution in THF and precipitation from ether, and finally dried under vacuum for 24 h.

**Table S1.** Molecular characterizations of the polymer samples.

---

| sample                | $M_n$ (SEC) [kg/mol] <sup>a</sup> | PDI <sup>b</sup> | NIPAM [mol %] <sup>c</sup> |
|-----------------------|-----------------------------------|------------------|----------------------------|
| PNIPAM                | 12                                | 1.58             | 100                        |
| Diblock Copolymer     | 12                                | 1.72             | 0.55                       |
| Statistical Copolymer | 9.1                               | 1.45             | 0.58                       |
| PVCL                  | 10                                | 1.66             | 0                          |

<sup>a</sup>Apparent number average molecular weight determined by GPC in DMF using PMMA standards.

<sup>b</sup>Apparent dispersities determined by GPC in DMF. <sup>c</sup>Molar NIPAM ratio determined by <sup>1</sup>H NMR.

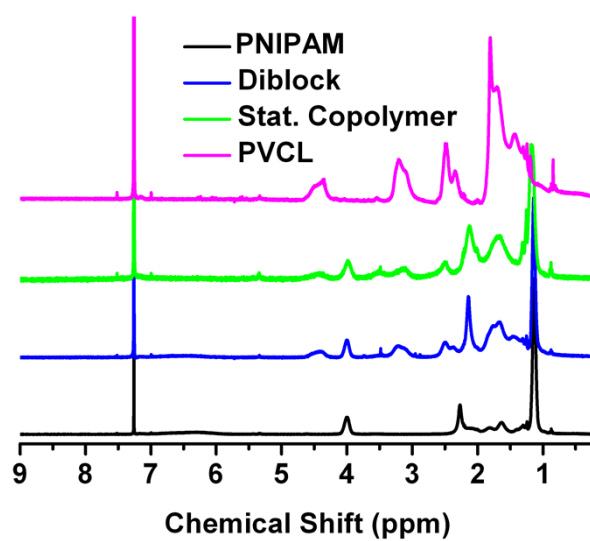

**Figure S1.** <sup>1</sup>H NMR spectra of PNIPAM (black), Diblock (blue), Statistical Copolymer (green) and PVCL (pink) in CDCl<sub>3</sub>.

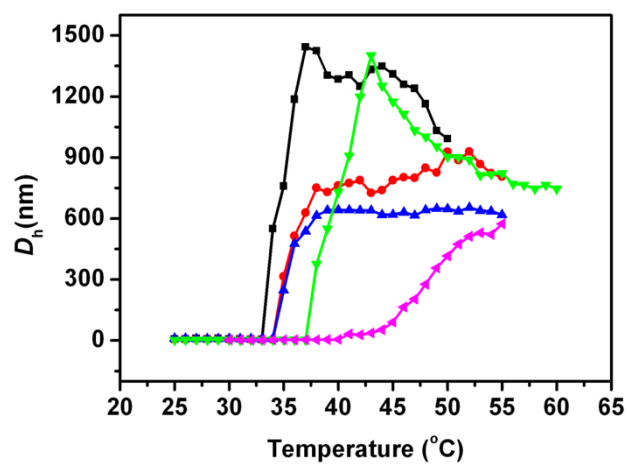

**Figure S2.** DLS curves of PNIPAM (black), Mixture (red), Diblock (blue), Statistical Copolymer (green) and PVCL (pink) in H<sub>2</sub>O upon heating at the concentration of 0.2 mg/ml.

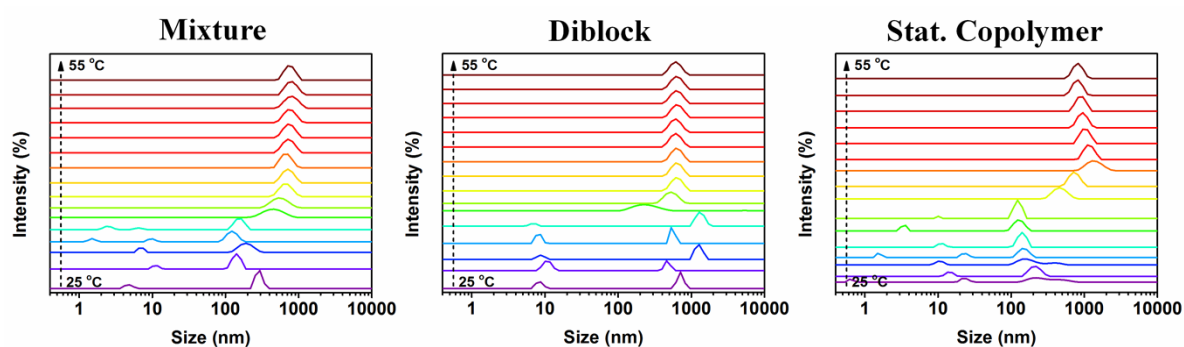

**Figure S3.** Hydrodynamic diameter ( $D_h$ ) distribution of Mixture, Diblock and Statistical Copolymer during the heating process obtained from the DLS measurements.
